# Supplementary material for: Development of new acid-functionalized resins for combinatorial synthesis on solid supportsElectronic supplementary information (ESI) available: experimental section. See http://www.rsc.org/suppdata/cc/b2/b204423d/
Source: Royal Society of Chemistry journal article supplement (doi:10.1039/b204423d), 2002-07-11
Supplement: b204423d.doc [file b204423d.doc]

Supplementary Material (ESI) for Chemical Communications

This journal is © The Royal Society of Chemistry 2002

Development of New Acid-Functionalized Resins for Combinatorial Synthesis on Solid Support

Frank Stieberb and Herbert Waldmanna*

*a*Abteilung Chemische Biologie, Otto-Hahn-Str. 11, 44227 Dortmund (Germany) and Universität Dortmund, Fachbereich 3, Organische Chemie, 44221 Dortmund (Germany), Fax *49/231/133-2499, Phone *49/231/133-2400,E-mail:* [*herbert.waldmann@mpi-dortmund.mpg.de*](mailto:herbert.waldmann@mpi-dortmund.mpg.de)

*b Dipl.-Chem. Frank Stieber, Semaia Pharmaceuticals GmbH & Co.KG, Emil-Figge-Strasse 76A*

*44227 Dortmund (Germany)*

### Experimental Section

**General Procedures**: IR spectra were measured on Bruker IFS 88 or Bruker Vector 22 spectrometers with a diffuse reflectance head A527 from Spectra Tech. UV spectra were measured on a Perkin Elmer Cary 50 spectrometer.

**Materials**: The resins were purchased from Rapp Polymere, Advanced Chemtech and Argonaut Technologies. All reactions were performed under an argon atmosphere with freshly destilled and dried solvents. All solvents were destilled using standard procedures. Commercial reagents were used without further purification.

**General Procedure for the preparation of acid-functionalized supports 6 using adipic acid dichloride (procedure A):** To a suspension of the appropiate amino-functionalized resin **3** in CH2Cl2 and pyridine (5:1, 30 ml/g resin) slowly adipic acid dichloride (30 eq.) was added and the mixture was shaken for 18 h at room temperature. The mixture was filtered, the resin washed with THF, THF/1 n HCl (1:1), THF, methanol, methylene chloride und cyclohexane (2 times each) and dried to constant weight in vacuo.

**General Procedure for the preparation of acid-functionalized supports 6 using adipic acid anhydride (procedure B):** To a suspension of the appropiate amino-functionalized resin **3** in methylene chloride (30 ml/g resin) freshly distilled adipic acid anhydride (10 eq.) was added and the mixture was shaken for 24 h at room temperature. The mixture was filtered, the resin washed with methylene chloride, THF, THF/1 n HCl (1:1), THF, methanol, methylene chloride und cyclohexane (2 times each) and dried to constant weight in vacuo.

**General Procedure for the preparation of acid-functionalized supports 6 using adipic acid monomethyl ester (procedure C):** To a suspension of the appropiate amino-functionalized resin **3** in methylene chloride (30 ml/g resin) *N*,*N*-diisopropylcarbodiimide (3 eq.), 1‑hydroxybenzotriazole (3 eq.), triethylamine (3 eq.) and adipic acid monomethyl ester (3 eq.) were added and the mixture was shaken for 18 h at room temperature. The mixture was filtered, the resin washed with methylene chloride, THF, THF/1 n HCl (1:1), THF, methanol, methylene chloride und cyclohexane (2 times each) and dried to constant weight in vacuo. The resin was suspended in dioxane (20 ml/g resin) and after 15 min 1% aqueous lithium hydroxide solution (20 ml/g resin) was added. The mixture was shaken for 18 h at room temperature, filtered, the resin washed with methylene chloride, THF, THF/1 n HCl (1:1), THF, methanol, methylene chloride and cyclohexane (2 times each) and dried to constant weight in vacuo.

**General Procedure for determination of the loading of acid-functionalized resins (procedure D):** To a suspension of the acid-functionalized resin (30-50 mg) in DMF (10 ml) cesium carbonate (10 equiv.) and 2‑methoxy-5-nitrobenzyl bromide were added. The mixture was shaken for 20 h and subsequently filtered. The resin was washed with THF, THF/1 n HCl (1:1), THF, methanol, methylene chloride and cyclohexane (2 times each) and dried to constant weight in vacuo. 10.0 mg of this polymer-bound 2-methoxy-5-nitrobenzyl ester was suspended in dioxane (10 ml) and after 15 min 0.5% lithium hydroxide solution (5 ml) was added. The mixture was shaken for 24 h at room temperature and subsequently neutralized with 1 n HCl (pH 7-8). The mixture was evaporated to dryness, the residue was suspended in methanol (20 ml) and the mixture was shaken for 15 min. The loading was calculated using UV-spectroscopic determination of the released 2-methoxy-5-nitrobenzylalcohols at 307 nm ( = 10200 mol‑1dm3cm-1).

**Acid-functionalized TentaGel 6a:** According to general procedure **A** TentaGel-NH2 (5 g, 2.10 mmol, Rapp Polymere, 0.42 mmol/g, 130 µm) was reacted with adipic acid dichloride (9.0 ml, 63 mmol) in methylene chloride and pyridine (5:1, 150 ml) to yield the off-white resin **6a (**5.18 g). IR (SiO2): 3357 (OH), 1739 (C=O), 1667 (C=O), 1109 (C-O-C) cm-1; loading: 0.24 mmol/g (59%). Preparation of **6a** according to general procedure **B**: loading: 0.39 mmol/g (97%). Preparation of **6a** according to general procedure **C**: loading: 0.37 mmol/g (92%).

**Acid-functionalized polystyrene 6b:** According to general procedure **A** polystyrene-NH2 (5 g, 5.50 mmol, Rapp Polymere, 1.1 mmol/g, 100-200 mesh) was reacted with adipic acid dichloride (23.7 ml, 165 mmol) in methylene chloride and pyridine (5:1, 150 ml) to yield the off-white resin **6b** (5.23 g). IR (SiO2): 3349 (OH), 1742 (C=O), 1658 (C=O) cm‑1; loading: 0.42 mmol/g (44%). Preparation of **6b** according to general procedure **B**: loading: 0.93 mmol/g (96%). Preparation of **6b** according to general procedure **C**: loading: 0.92 mmol/g (95%).

**Acid-functionalized ArgoPore 6c:** According to general procedure **A** ArgoPore-NH2 (5 g, 5.65 mmol, Argonaut Technologies, 1.13 mmol/g, 60-140 mesh) was reacted with adipic acid dichloride (24.3 ml, 169.5 mmol) in methylene chloride and pyridine (5:1, 150 ml) to yield the off-white resin **6c** (5.15 g). IR (SiO2): 3412 (OH), 1742 (C=O), 1682 (C=O) cm‑1; loading: 0.35 mmol/g (36%). Preparation of **6c** according to general procedure **C**: loading: 0.94 mmol/g (95%).

**Acid-functionalized high-loaded polystyrene 8:** According to general procedure **C** tris(2-aminoethyl)amine resin **7** (5.2 g, 10.9 mmol, Novabiochem, 2.1 mmol/g, 200-400 mesh) was reacted with *N*,*N*‑diisopropyl­carbodiimide (5.1 ml, 32.8 mmol), 1‑hydroxybenzotriazole (5.0 g, 32.8 mmol), triethylamine (4.6 ml, 32.8 mmol) and adipic acid monomethylester (4.5 ml, 32.8 mmol) in methylene chloride (150 ml) to yield the off-white resin **8** (6.45 g). IR (SiO2): 3330 (OH), 1727 (C=O), 1658 (C=O) cm‑1; loading: 1.59 mmol/g (96%).

**Polystyrene-bound alcohol 10:** Sodium hydride (692 mg, 17.3 mmol, 60% in mineral oil) was added to a solution of butanediol **9** (1.54 ml, 17.3 mmol) in dry DMF (100 ml) at 0°C and the mixture was shaken for 90 min. A suspension of chloromethylated polystyrene (4.81 g, 4.33 mmol, Advanced Chemtech, 0.9 mmol/g, 100-200 mesh) and tetrabutylammonium iodide (159 mg, 0.433 mmol) in dry DMF (50 ml) was added. The mixture was shaken for 18 h at room temperature and subsequently filtered. The resin was washed with DMF, THF, THF/1 n HCl (1:1), THF, methanol, methylene chloride und cyclohexane (2 times each), dried to constant weight in vacuo to yield the off-white resin **10** (4.82 g). IR (SiO2): 3448 (OH), 1099 (C-O-C) cm-1; loading: 0.82 mmol/g (96%). The loading was determined as followed:To a suspension of **10** (10 mg) in methylene chloride and pyridine (10:1, 3 ml) Fmoc-Cl (10 eq.) was added and the mixture was shaken at room temperature for 2 h. The resin was filtered, washed with methylene chloride, THF and methylene chloride (2 times each) and dried to constant weight in vacuo. The Fmoc-loading of the resin was determined by standard procedures and used to calculate the hydroxyl-loading.

**Polystyrene-bound aldehyde 11:** To a suspension of polystyrene-bound alcohol **10** (4.5 g, 3.69 mmol) in THF/DMSO (1:1, 90 ml) IBX (2.99 g, 11.07 mmol) was added and the mixture was shaken for 18 h at room temperature. The mixture was filtered and washed with THF/DMSO (1:1), THF, methanol, methylene chloride and cyclohexane (2 times each), dried to constant weight in vacuo to yield the off-white resin **11** (4.45 g). IR (SiO2): 2717 (CHO), 1727 (C=O).

**Polystyrene-bound acid 12:** To a suspension of polystyrene-bound aldehyde **11** (4.0 g, 3.28 mmol) in 1,2-dichloroethane/cyclohexane (1:1, 160 ml) *m*‑chloroperbenzoic acid (*m*-CPBA, 70%, 8.1 g, 32.8 mmol) was added and the mixture was refluxed for 48 h. After cooling to room temperature the mixture was filtered, washed with methylene chloride, THF, THF/1 n HCl (1:1), methanol, methylene chloride and cyclohexane (2 times each), dried to constant weight in vacuo to yield the off-white resin **12** (3.98 g). IR (SiO2): 3325 (OH), 1743 (C=O); loading: 0.79 mmol/g (93% over 3 steps, starting from chloromethylated polystyrene).

**TentaGel-bound acid 16:** To a suspension of TentaGel-OH (500 mg, 0.20 mmol, Rapp Polymere, 0.4 mmol/g) in methylene chloride (10 ml) trichloroacetonitrile (1.5 ml) and DBU (100 µl) were added at 0°C. The mixture was warmed to room temperature and subsequently filtered. The resin was washed with methylene chloride, THF, methylene chloride and cyclohexane (2 times each) and dried to constant weight in vacuo. This resin was added to a suspension of molecular sieves (500 mg, 4 Å) and glycolic acid *n*-butyl ester in methylene chloride (10 ml) and hexane (10 ml) and shaken for 15 min. Boron trifluoride diethyl etherate (50 µl) was added, the mixture was shaken for 2 h and subsequently filtered. The resin was washed with methylene chloride, THF, THF/1 n HCl (1:1), methanol, methylene chloride and cyclohexane (2 times each) and dried to constant weight in vacuo. This procedure (formation of the trichloroacetimidate and subsequent reaction with glycolic acid *n*‑butyl ester) was repeated twice. For the hydrolysis of the *n*-butyl ester the resin was suspended in dioxane (10 ml) and 1% lithium hydroxide solution (10 ml) were added. The mixture was shaken for 18 h and subsequently filtered. The resin was washed with THF, THF/1 n HCl (1:1), THF, methanol, methylene chloride and cyclohexane (2 times each) and dried to constant weight in vacuo to yield the off-white resin (469 mg). IR (KBr): 3468 (OH), 1755 (C=O); loading: 0.34 mmol/g (86%).
